# Supplementary material for: An ensemble docking-based virtual screening according to different TRPV1 pore states toward identifying phytochemical activators
Source: Royal Society of Chemistry journal article supplement (doi:10.1039/d2nj04918j), 2023-01-01
Supplement: d2nj04918j1.pdf [file d2nj04918j1.pdf]

An ensemble docking-based virtual screening according to  
different TRPV1 pore states toward identifying phytochemical  
activators

Mina Maddah<sup>1</sup> Nadia Hoseinian<sup>1</sup> and Mahdi Pourfath<sup>1,\*</sup>

<sup>1</sup>University of Tehran, Tehran, Iran

\*pourfath@ut.ac.ir

**Table A.1**

The details of 21 selected PDBs for the TRPV1 structure.

| <b>PDB ID</b> | <b>Name</b> | <b>Method/Resolution</b>                                                                         | <b>PDB ID</b> | <b>Name</b> | <b>Method/Resolution</b>                                                      |
|---------------|-------------|--------------------------------------------------------------------------------------------------|---------------|-------------|-------------------------------------------------------------------------------|
| 1             | 7LQZ        | Structure of squirrel TRPV1 in complex with RTX                                                  | 12            | 7L2W        | cryo-EM structure of RTX-bound minimal TRPV1 with NMDG at state a             |
|               |             | ELECTRON MICROSCOPY 3.41                                                                         |               |             | ELECTRON MICROSCOPY 3.16                                                      |
| 2             | 7LR0        | Structure of squirrel TRPV1 in complex with capsaicin                                            | 13            | 7L2V        | cryo-EM structure of RTX-bound minimal TRPV1 with NMDG at state b             |
|               |             | ELECTRON MICROSCOPY 3.81                                                                         |               |             | ELECTRON MICROSCOPY 3.64                                                      |
| 3             | 3J5R        | Reconstruction of TRPV1 ion channel in complex with capsaicin by single particle cryo-microscopy | 14            | 7L2U        | cryo-EM structure of DkTx-bound minimal TRPV1 in open state                   |
|               |             | ELECTRON MICROSCOPY 4.2                                                                          |               |             | ELECTRON MICROSCOPY 3.47                                                      |
| 4             | 7LPB        | Cryo-EM structure of full-length TRPV1 with capsaicin at 25 degrees Celsius                      | 15            | 7L2T        | cryo-EM structure of DkTx-bound minimal TRPV1 in partial open state           |
|               |             | ELECTRON MICROSCOPY 3.54                                                                         |               |             | ELECTRON MICROSCOPY 3.08                                                      |
| 5             | 7L2N        | Cryo-EM structure of RTX-bound full-length TRPV1 in C1 state                                     | 16            | 7L2M        | Cryo-EM structure of DkTx/RTX-bound full-length TRPV1                         |
|               |             | ELECTRON MICROSCOPY 3.09                                                                         |               |             | ELECTRON MICROSCOPY 3.84                                                      |
| 6             | 7MZ E       | Cryo-EM structure of minimal TRPV1 with 2 bound RTX in opposite pockets                          | 17            | 7L2L        | Cryo-EM structure of RTX-bound full-length TRPV1 in O1 state                  |
|               |             | ELECTRON MICROSCOPY 3.42                                                                         |               |             | ELECTRON MICROSCOPY 3.42                                                      |
| 7             | 7MZ D       | Cryo-EM structure of minimal TRPV1 with RTX bound in C2 state                                    | 18            | 5IS0        | Structure of TRPV1 in complex with capsazepine, determined in lipid nanodisc  |
|               |             | ELECTRON MICROSCOPY 2.90                                                                         |               |             | ELECTRON MICROSCOPY 3.43                                                      |
| 8             | 7MZ C       | Cryo-EM structure of minimal TRPV1 with RTX bound in C1 state                                    | 19            | 5IRX        | Structure of TRPV1 in complex with DkTx and RTX, determined in lipid nanodisc |
|               |             | ELECTRON MICROSCOPY 3.03                                                                         |               |             | ELECTRON MICROSCOPY 2.95                                                      |
| 9             | 7MZ         | Cryo-EM structure of minimal TRPV1 with 2                                                        | 20            | 7L2R        | Cryo-EM structure of DkTx-bound minimal                                       |
|               |             | ELECTRON MICROSCOPY                                                                              |               |             | ELECTRON MICROSCOPY                                                           |

|           |      |                                                                   |                             |           |                                                                                            |                             |
|-----------|------|-------------------------------------------------------------------|-----------------------------|-----------|--------------------------------------------------------------------------------------------|-----------------------------|
|           | A    | bound RTX in adjacent pockets                                     | 3.46                        |           | TRPV1 at the pre-open state                                                                | 3.30                        |
| <b>10</b> | 7MZ5 | Cryo-EM structure of RTX-bound full-length TRPV1 in C2 state      | ELECTRON MICROSCOPY<br>2.76 | <b>21</b> | 3J5P Structure of TRPV1 ion channel determined by single particle electron cryo-microscopy | ELECTRON MICROSCOPY<br>3.27 |
| <b>11</b> | 7L2X | cryo-EM structure of RTX-bound minimal TRPV1 with NMDG at state c | ELECTRON MICROSCOPY<br>3.26 |           |                                                                                            |                             |

---

**Table A.2**

CHEMBL IDs of active compounds of TRPV1 target that were selected from ChEMBL database (<https://www.ebi.ac.uk/chembl/>).

|               |               |               |               |               |               |
|---------------|---------------|---------------|---------------|---------------|---------------|
| CHEMBL1761696 | CHEMBL1092853 | CHEMBL1214342 | CHEMBL457188  | CHEMBL408581  | CHEMBL404165  |
| CHEMBL456162  | CHEMBL456778  | CHEMBL526827  | CHEMBL3393837 | CHEMBL226723  | CHEMBL375681  |
| CHEMBL1807875 | CHEMBL1807877 | CHEMBL255420  | CHEMBL229430  | CHEMBL214989  | CHEMBL516769  |
| CHEMBL2177429 | CHEMBL1092852 | CHEMBL498666  | CHEMBL190874  | CHEMBL511391  | CHEMBL3935231 |
| CHEMBL457003  | CHEMBL1761693 | CHEMBL2312050 | CHEMBL3671846 | CHEMBL3682255 | CHEMBL1761695 |
| CHEMBL195115  | CHEMBL214796  | CHEMBL258054  | CHEMBL258265  | CHEMBL457842  | CHEMBL226672  |
| CHEMBL1173756 | CHEMBL258056  | CHEMBL497650  | CHEMBL1093132 | CHEMBL1779676 | CHEMBL1173690 |
| CHEMBL436638  | CHEMBL517566  | CHEMBL456128  | CHEMBL446258  | CHEMBL456152  | CHEMBL1173242 |
| CHEMBL3426347 | CHEMBL3644131 | CHEMBL3907261 | CHEMBL402637  | CHEMBL458058  | CHEMBL456571  |
| CHEMBL1089119 | CHEMBL1779687 | CHEMBL3644136 | CHEMBL102073  | CHEMBL195875  | CHEMBL419351  |
| CHEMBL231518  | CHEMBL3426378 | CHEMBL3426376 | CHEMBL258117  | CHEMBL323134  | CHEMBL456570  |
| CHEMBL101751  | CHEMBL214331  | CHEMBL254866  | CHEMBL465990  | CHEMBL460373  | CHEMBL1761691 |
| CHEMBL1684275 | CHEMBL3326581 | CHEMBL3682254 | CHEMBL3956803 | CHEMBL3961217 | CHEMBL2024668 |
| CHEMBL1761702 | CHEMBL1807883 | CHEMBL1172953 | CHEMBL231206  | CHEMBL387996  | CHEMBL2088399 |
| CHEMBL1779839 | CHEMBL1083396 | CHEMBL1779665 | CHEMBL3644129 | CHEMBL226724  | CHEMBL3644137 |
| CHEMBL427266  | CHEMBL1807882 | CHEMBL191247  | CHEMBL513942  | CHEMBL1214402 | CHEMBL1089824 |
| CHEMBL1807878 | CHEMBL1669532 | CHEMBL104028  | CHEMBL1761700 | CHEMBL3959317 | CHEMBL3326569 |

**Table A.3**

The obtained results for molecular docking for phytochemicals of capsicum, cinnamon, and ginger on three MD clusters of the TRPV1 receptor.

| Name                                 | PubChem ID | #  | cluster-1 (kcal/mol) | cluster-2 (kcal/mol) | cluster-3 (kcal/mol) |
|--------------------------------------|------------|----|----------------------|----------------------|----------------------|
| <b>Capsicum</b>                      |            |    |                      |                      |                      |
| Homodihydrocapsaicin II              | 387095179  | 1  | -6.5                 | -7                   | -7.3                 |
| 17-Hydroxycapsaicin                  | 129835627  | 2  | -6.6                 | -7.7                 | -6.5                 |
| N-Vanillyl-9-methyl-6-decenamide     | 71448975   | 3  | -6.5                 | -6.3                 | -7.8                 |
| Homocapsaicin II                     | 11674147   | 4  | -7                   | -7.7                 | -7                   |
| Capsiate                             | 9839519    | 5  | -6.4                 | -6.6                 | -7.7                 |
| Nordihydrocapsiate                   | 9817607    | 6  | -6.4                 | -6.3                 | -6.4                 |
| Homocapsaicin                        | 6442566    | 7  | -6.9                 | -7.2                 | -7.9                 |
| Scopoletin                           | 5280460    | 8  | -7                   | -6.4                 | -6.2                 |
| Homodihydrocapsaicin                 | 3084336    | 9  | -6.4                 | -7.3                 | -7                   |
| Capsaicin                            | 1548943    | 10 | -7.3                 | -7                   | -7.8                 |
| n-Vanillyldecanamide                 | 169252     | 11 | -6.8                 | -6.8                 | -6.9                 |
| Nordihydrocapsaicin                  | 168836     | 12 | -6.9                 | -6.6                 | -6.8                 |
| Dihydrocapsaicin                     | 107982     | 13 | -6.8                 | -6.9                 | -7.2                 |
| Vanillylamine                        | 70966      | 14 | -5.6                 | -5                   | -6.2                 |
| 4-Hydroxy-3-methoxyphenylacetone     | 17262      | 15 | -6.4                 | -5.8                 | -5.8                 |
| Homovanillyl alcohol                 | 16928      | 16 | -6.1                 | -5.5                 | -5                   |
| N-(3-(Aminomethyl)benzyl)acetamidine | 1433       | 17 | -6.3                 | -5.8                 | -5.3                 |
| Nonivamide                           | 2998       | 18 | -6.6                 | -6.5                 | -6.4                 |
| <b>Cinnamon</b>                      |            |    |                      |                      |                      |
| Benzaldehyde (Vanillin azine)        | 135414383  | 1  | -7.3                 | -6.7                 | -8.8                 |
| 3,5,6-Trimethyleugenol               | 45266889   | 2  | -6.8                 | -5.9                 | -5.5                 |
| 2-Hydroxycinnamaldehyde              | 5318169    | 3  | -6.1                 | -5.6                 | -5.4                 |
| Caffeic acid phenethyl ester         | 5281787    | 4  | -7.3                 | -6.8                 | -8.5                 |
| Sinapaldehyde                        | 5280802    | 5  | -6.1                 | -6.2                 | -4.6                 |

|                                   |           |    |             |             |             |
|-----------------------------------|-----------|----|-------------|-------------|-------------|
| 4-Hydroxy-3-methoxycinnamaldehyde | 5280536   | 6  | -6.3        | -5.8        | -6          |
| cis-Isoeugenol                    | 1549041   | 7  | -6          | -5.7        | -5.1        |
| Caffeic acid                      | 689043    | 8  | -6.8        | -6.2        | -4.9        |
| Sinapic acid                      | 637775    | 9  | -6.6        | -6.5        | -5.4        |
| 4-Hydroxycinnamic acid            | 637542    | 10 | -6.8        | -6.1        | -6.3        |
| 2-Hydroxycinnamic acid            | 637540    | 11 | -7          | -6.3        | -6          |
| Phenol, 2-methoxy(2-propenyl)-    | 596373    | 12 | -5.9        | -5.5        | -5.7        |
| Cinnamic acid                     | 444539    | 13 | -6.4        | -6.1        | -5.3        |
| <b>1,3,6-tri-o-galloylglucose</b> | 250395    | 14 | <b>-9.8</b> | <b>-8.9</b> | <b>-7.6</b> |
| 4-Allyl-2,6-dimethoxyphenol       | 226486    | 15 | -6          | -5.6        | -4.2        |
| <b>Cinnamophilin</b>              | 169883    | 16 | <b>-7.4</b> | <b>-7.4</b> | <b>-9</b>   |
| 3-Hydroxy-4-methoxybenzoic acid   | 12575     | 17 | -6.3        | -5.5        | -4.9        |
| 3-O-Methyldopa                    | 9307      | 18 | -6.6        | -6.2        | -5          |
| <b>Cianidanol</b>                 | 9064      | 19 | <b>-7.9</b> | <b>-8.4</b> | <b>-9</b>   |
| 3,4-Dihydroxybenzaldehyde         | 8768      | 20 | -5.9        | -5.1        | -4.4        |
| 2-Methoxybenzaldehyde             | 8658      | 21 | -5.5        | -4.9        | -4.4        |
| Vanillic acid                     | 8468      | 22 | -6.3        | -5.6        | -4.4        |
| Acetyleneugenol                   | 7136      | 23 | -6.5        | -6          | -5.2        |
| Eugenol                           | 3314      | 24 | -6          | -5.8        | -5.8        |
| Homovanillic acid                 | 1738      | 25 | -6.5        | -5.6        | -5.7        |
| Guaiacol                          | 460       | 26 | -5.4        | -4.7        | -4.2        |
| Gallic acid                       | 370       | 27 | -6.4        | -5.5        | -5.1        |
| Salicylic acid                    | 338       | 28 | -6.1        | -5.4        | -5.3        |
| 4-Hydroxybenzaldehyde             | 126       | 29 | -5.7        | -4.8        | -5.2        |
| 3,4-Dihydroxybenzoic acid         | 72        | 30 | -6.2        | -5.5        | -5.9        |
| <b>Ginger</b>                     |           |    |             |             |             |
| 10-Gingerdiol                     | 101572265 | 1  | -6.5        | <b>-7.1</b> | -5.2        |
| [12]-Shogaol                      | 85080428  | 2  | -6.4        | -5.7        | -6.9        |
| [10]-Gingerdione                  | 14440539  | 3  | -6.6        | -6.9        | -5.4        |
| Gingerdiol                        | 11369949  | 4  | -6.3        | -6.6        | -5.8        |
| 6-Dihydroparadol                  | 10378937  | 5  | -6.3        | -5.4        | -5.8        |

|                                                    |         |    |             |             |             |
|----------------------------------------------------|---------|----|-------------|-------------|-------------|
| [6]-Dehydrogingerdione                             | 9796015 | 6  | -6.6        | -6.1        | -5.9        |
| [4]-Shogaol                                        | 9794897 | 7  | -6.7        | -6.3        | -6          |
| [10]-Shogaol                                       | 6442612 | 8  | -6.9        | -6.5        | -7.7        |
| [8]-Shogaol                                        | 6442560 | 9  | -6.8        | -6.9        | -7.4        |
| [4]-Gingerdiol 3,5-diacetate                       | 5318274 | 10 | -7          | -6.6        | -5          |
| 5-Hydroxy-1-(4-hydroxy-3-methoxyphenyl)octan-3-one | 5317596 | 11 | -6.3        | -6.5        | -5.5        |
| [6]-Gingerdiol 3,5-diacetate                       | 5317587 | 12 | -6.9        | -6.9        | -5.4        |
| Shogaol                                            | 5281794 | 13 | -6.3        | -6.6        | -6.6        |
| <b>Gingerenone A</b>                               | 5281775 | 14 | <b>-7.4</b> | <b>-7.5</b> | -6.1        |
| <b>Curcumin</b>                                    | 969516  | 15 | <b>-7.6</b> | <b>-7.9</b> | <b>-7.7</b> |
| Ferulic acid                                       | 445858  | 16 | -6.6        | -6.2        | -5.6        |
| Gingerol                                           | 442793  | 17 | -6.5        | -6.5        | -6.6        |
| (10)-Gingerol                                      | 168115  | 18 | -6.5        | -6.6        | -5.5        |
| (8)-Gingerol                                       | 168114  | 19 | <b>-7.2</b> | -5.9        | -6.1        |
| [6]-Gingerdione                                    | 162952  | 20 | -6.8        | -6.2        | -5.8        |
| 6-Gingesulfonic acid                               | 126890  | 21 | <b>-7.2</b> | -6.2        | -4.8        |
| <b>Dibenzylbutyrolactone</b>                       | 99938   | 22 | <b>-8.6</b> | <b>-7.6</b> | -6.8        |
| Paradol                                            | 94378   | 23 | -6.2        | -6.4        | -6.6        |
| 4-Ethyl-2-methoxyphenol                            | 62465   | 24 | -5.8        | -5.5        | -5          |
| Zingerone                                          | 31211   | 25 | -6.6        | -6.1        | -5.7        |
| 3-(4-Hydroxy-3-methoxyphenyl)propionic acid        | 14340   | 26 | -6.6        | -6          | -5.2        |
| Syringic acid                                      | 10742   | 27 | -6.1        | -5.9        | -5.4        |
| Acetovanillone                                     | 2214    | 28 | -6.1        | -5.7        | -4.8        |
| Vanillin                                           | 1183    | 29 | -5.8        | -5.2        | -4.3        |
| 2-Methoxy-4-vinylphenol                            | 332     | 30 | -5.8        | -5.5        | -4.7        |
| 4-Hydroxybenzoic acid                              | 135     | 31 | -5.9        | -5.1        | -4.6        |

**Table A.4**

Physicochemical Appraisal and ADMET profile of all phytochemicals.

| Pubchem ID      | # | MW    | XLogP | Hydrogen Don/Acc | Human intestinal absorption | Total clearance | Max tolerated | Ames test | LD50  | LOAEL |
|-----------------|---|-------|-------|------------------|-----------------------------|-----------------|---------------|-----------|-------|-------|
| <b>Capsicum</b> |   |       |       |                  |                             |                 |               |           |       |       |
| 6442566         | 7 | 319.4 | 4.1   | 2/3              | 89.731                      | 1.327           | 0.434         | no        | 2.087 | 1.865 |



| <b>Cinnamon</b> |    |        |     |     |        |        |       |    |       |       |
|-----------------|----|--------|-----|-----|--------|--------|-------|----|-------|-------|
| 9064            | 19 | 290.27 | 0.4 | 5/6 | 68.829 | 0.183  | 0.438 | no | 2.428 | 2.5   |
| <b>Ginger</b>   |    |        |     |     |        |        |       |    |       |       |
| 969516          | 15 | 368.4  | 3.2 | 2/6 | 82.19  | -0.002 | 0.081 | no | 1.833 | 2.228 |

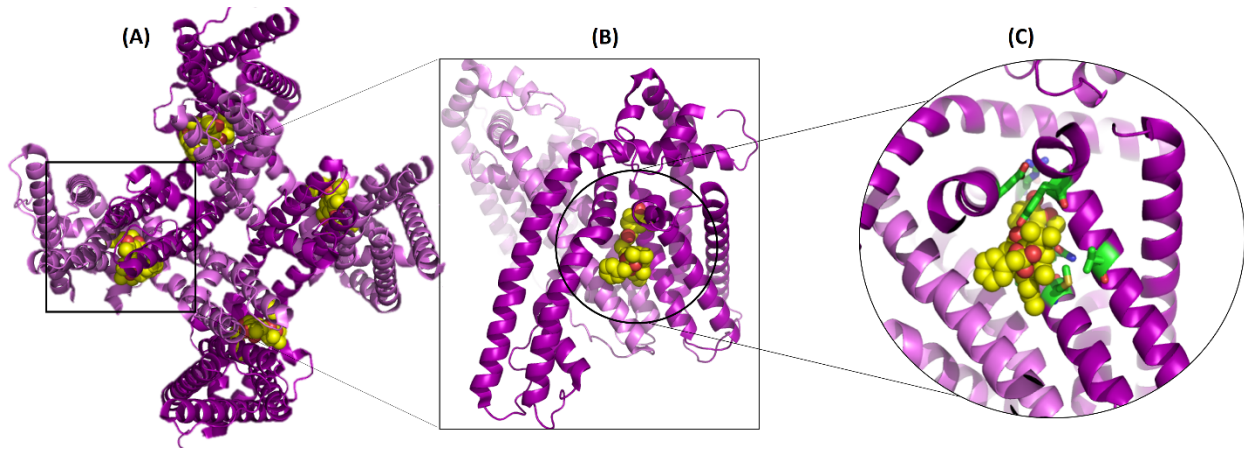

**Figure A.1.** Binding site of TRPV1 in complex with RTX from different views. (A) Top view focusing on the position of RTX binding mode between two neighboring subunits. (B) Side view showing only two adjacent subunits. (C) Amino acids in vanilloid binding pocket of TRPV1. S1-S4 domains flank and interact with S5-P-S6 pore modules from the adjacent subunit. Protein is shown by purple cartoon model. RTX is depicted by yellow sphere model. Amino acids are shown by green thick line.

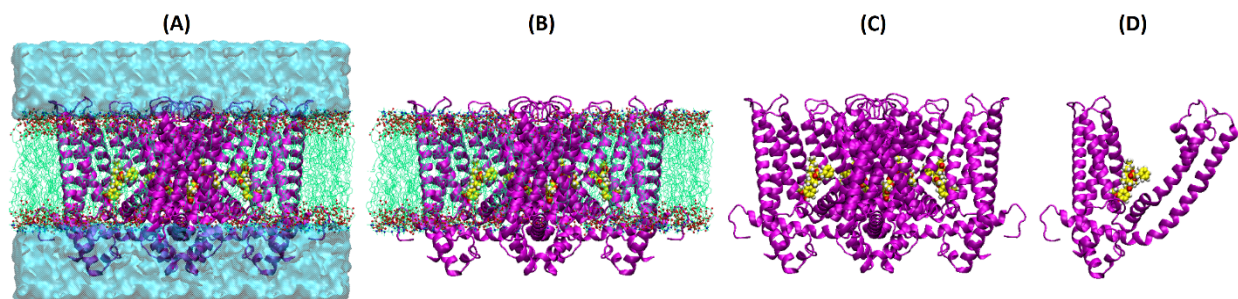

**Figure A.2.** Different views of the initial structure for MD simulation to extract the snapshots for ensemble docking. (A) Protein molecule embedded in POPC bilayer which solvated in water environment, (B) the orientation and position of protein compared to lipid, (C) the orientation of ligand molecules in all four subunits of TRPV1, and (D) only one subunit in complex with ligand. 7MZC is PDB code of protein and all ligands are RTX activator. Protein is represented by magenta cartoon structure and RTX ligands are shown by yellow sphere model. The water environment is shown by transparent light green and DOPC lipid by line model.

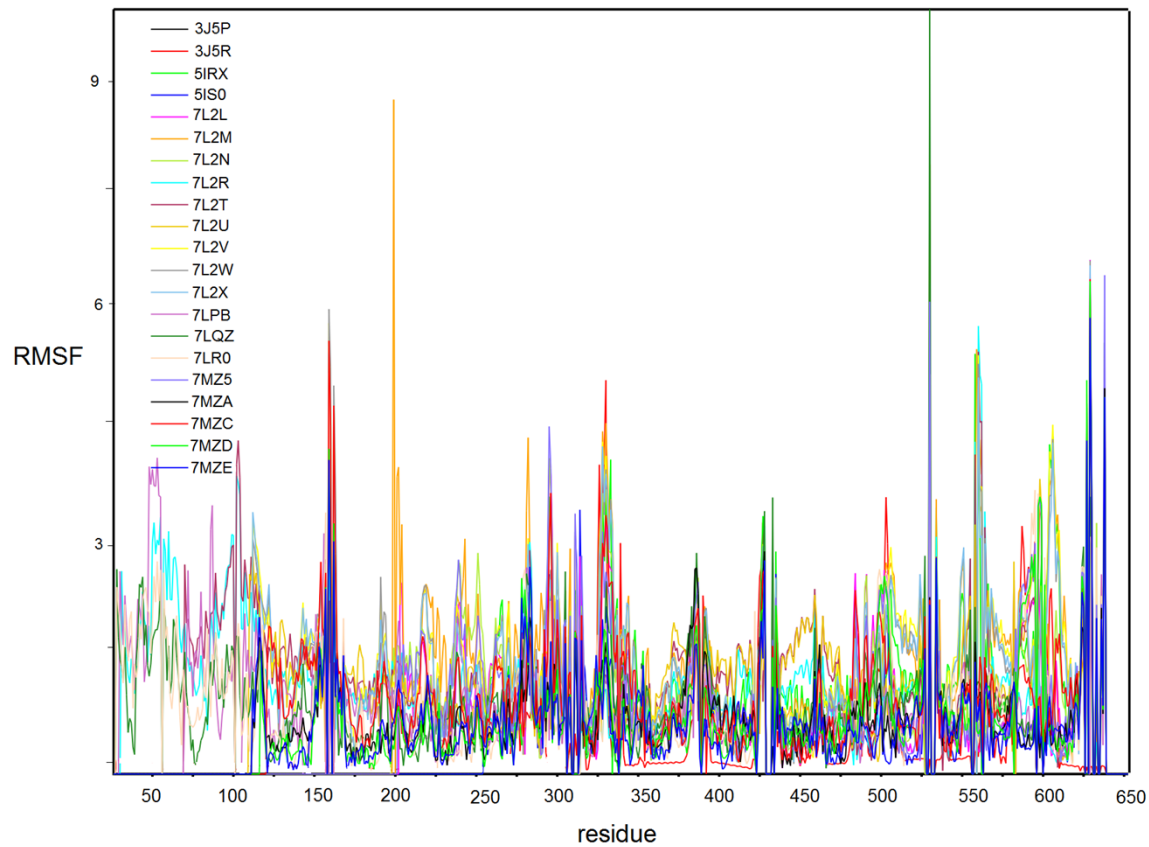

**Figure A.3.** Root-mean-square fluctuations for 21 TRPV1 structures.

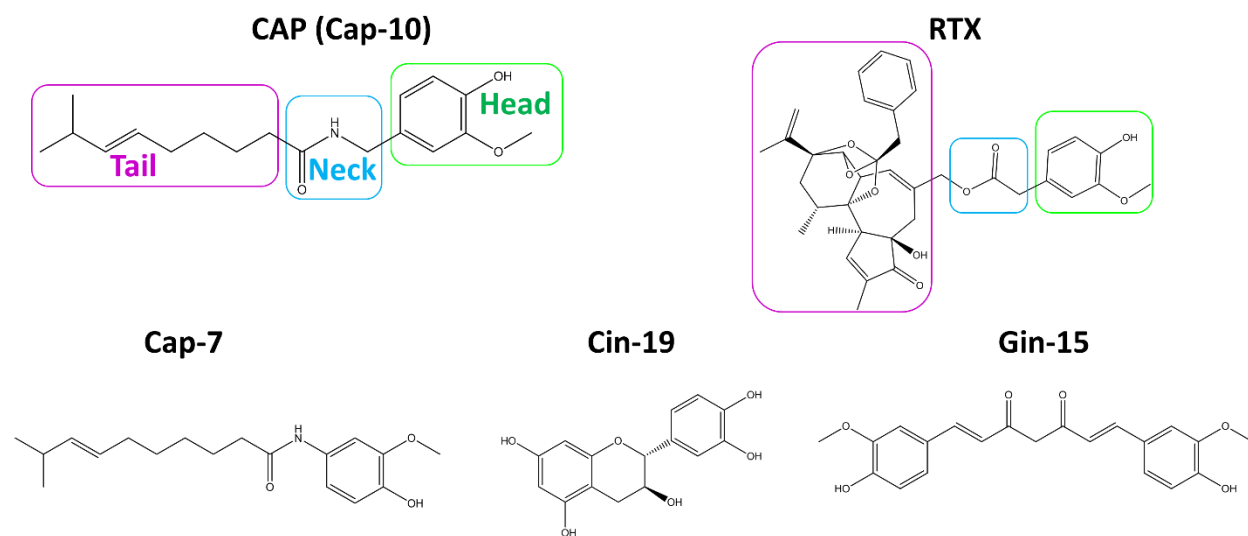

**Figure A.4.** The chemical structure of the three top-screened ligands and the structure of CAP and RTX activators.
